# Supplementary material
Source: publisher figshare collection journal article supplement (https://acs.figshare.com/ndownloader/files/4034047)

## ***Supporting Information***

### ***Manuscript Title:***

3-D Brickwall Polymeric Structure of TMEDA-Supported 1,4-Dilithio-1,3-Butadiene

### ***Authors:***

Shaoguang Zhang, Ming Zhan, Wen-Xiong Zhang,\* Zhenfeng Xi\*

### ***Affiliations:***

*Beijing National Laboratory for Molecular Sciences (BNLMS), Key Laboratory of Bioorganic Chemistry and Molecular Engineering of Ministry of Education, College of Chemistry, Peking University, Beijing 100871, China*

### ***Contents:***

|                                                                                         |              |
|-----------------------------------------------------------------------------------------|--------------|
| <b>1) X-ray crystallographic studies of 5-THF, 5-TMEDA</b>                              | <b>S2–S3</b> |
| <b>2) Scanned <sup>1</sup>H NMR and <sup>13</sup>C NMR spectra of all new compounds</b> | <b>S4–S5</b> |

## 1) X-ray crystallographic studies

The single crystals of **5**-THF and **5**-TMEDA suitable for X-ray analysis were grown as shown in the experimental section. The crystals were manipulated in the glovebox and were sealed in thin-walled glass capillaries. Data collections for **5**-THF and **5**-TMEDA were performed at  $-100$  °C on a RIGAKU CCD SATURN 724 diffractometer, using graphite-monochromated Mo  $K\alpha$  radiation ( $\lambda = 0.71073$  Å). The determination of crystal class and unit cell parameters was carried out by the CrystalClear (Rigaku Inc., 2007) program package. The raw frame data were processed using Crystal Structure (Rigaku/MSC 2000) to yield the reflection data file. These structures were solved by use of SHELXTL program. Refinement was performed on  $F^2$  anisotropically for all the non-hydrogen atoms by the full-matrix least-squares method. The hydrogen atoms were placed at the calculated positions and were included in the structure calculation without further refinement of the parameters. Crystal data, data collection and processing parameters for compounds **5**-THF and **5**-TMEDA are summarized in **Table S1**. Crystallographic data (excluding structure factors) have been deposited with the Cambridge Crystallographic Data Centre as supplementary publication nos. CCDC-939424 (**5**-THF), CCDC-939423 (**5**-TMEDA). Copies of these data can be obtained free of charge from the Cambridge Crystallographic Data Centre via [www.ccdc.cam.ac.uk/data\\_request/cif](http://www.ccdc.cam.ac.uk/data_request/cif).<sup>1</sup>

**Table S1.** Crystallographic data and structure refinement details for **5**-THF and **5**-TMEDA.

|                                            | <b>5</b> -THF                                                  | <b>5</b> -TMEDA                                                                |
|--------------------------------------------|----------------------------------------------------------------|--------------------------------------------------------------------------------|
| Formula                                    | C <sub>40</sub> H <sub>72</sub> Li <sub>4</sub> O <sub>4</sub> | (C <sub>36</sub> H <sub>72</sub> Li <sub>4</sub> N <sub>4</sub> ) <sub>n</sub> |
| <i>Mw</i>                                  | 644.74                                                         | (558.72) <sub>n</sub>                                                          |
| crystal system                             | Monoclinic                                                     | Tetragonal                                                                     |
| space group                                | C2/c                                                           | I4(1)/a                                                                        |
| <i>a</i> [Å]                               | 25.138(9)                                                      | 17.806(3)                                                                      |
| <i>b</i> [Å]                               | 8.419(3)                                                       | 17.806(3)                                                                      |
| <i>c</i> [Å]                               | 20.378(7)                                                      | 12.312(3)                                                                      |
| $\alpha$                                   | 90                                                             | 90                                                                             |
| $\beta$ [°]                                | 97.560(6)                                                      | 90                                                                             |
| $\gamma$                                   | 90                                                             | 90                                                                             |
| <i>V</i> [Å <sup>3</sup> ]                 | 4275(2)                                                        | 3903.7(11)                                                                     |
| <i>Z</i>                                   | 4                                                              | 16                                                                             |
| $\rho_{\text{calcd}}$ [gcm <sup>-3</sup> ] | 1.002                                                          | 1.002                                                                          |
| $\mu$ [mm <sup>-1</sup> ]                  | 0.060                                                          | 0.056                                                                          |
| <i>F</i> (000)                             | 1424                                                           | 1312                                                                           |
| $\theta$ range [°]                         | 2.71-25.36                                                     | 3.05-26.36                                                                     |
| no of reflns collected                     | 9884                                                           | 5593                                                                           |
| no of indep reflns                         | 3889                                                           | 1449                                                                           |
| no of variables                            | 219                                                            | 100                                                                            |

|                                        |              |         |
|----------------------------------------|--------------|---------|
| <i>GOF</i>                             | 1.18         | 1.074   |
| <i>R</i> [ <i>I</i> > 2σ ( <i>I</i> )] | 0.09350.1168 | 0.05795 |
| <i>R<sub>w</sub></i>                   | 0.22930.2453 | 0.2048  |

## References:

- (1) G. M. Sheldrick, SHELXTL 5.10 for Windows NT: *Structure Determination Software Programs* Bruker Analytical X-ray Systems, Inc.: (Madison, WI, 1997).

## 2) Scanned $^1\text{H}$ NMR and $^{13}\text{C}$ NMR spectra of all new compounds

### $^1\text{H}$ NMR-5

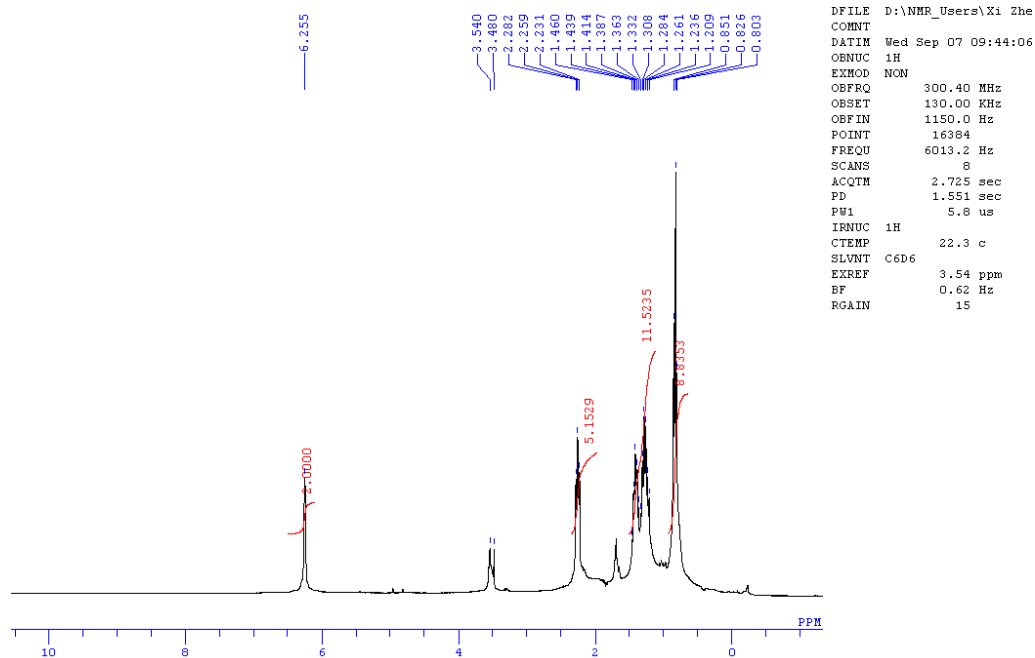

### $^{13}\text{C}$ NMR-5

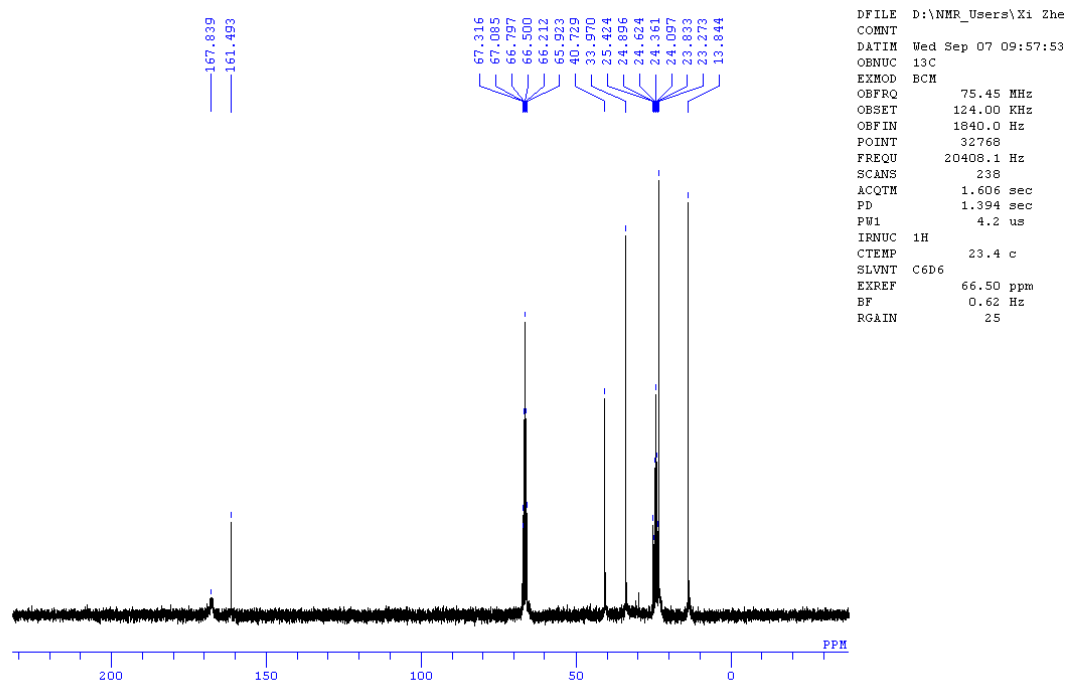

<sup>1</sup>H NMR-5-TMEDA

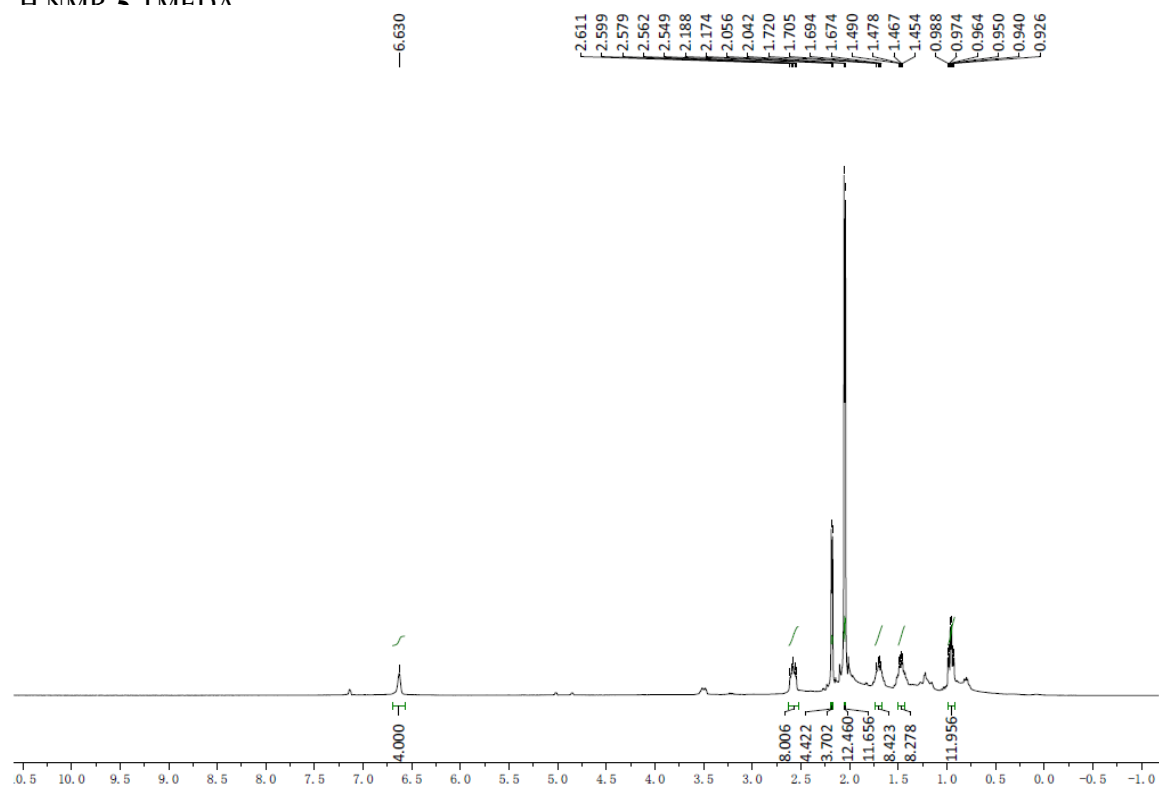

<sup>13</sup>C NMR-5-TMEDA

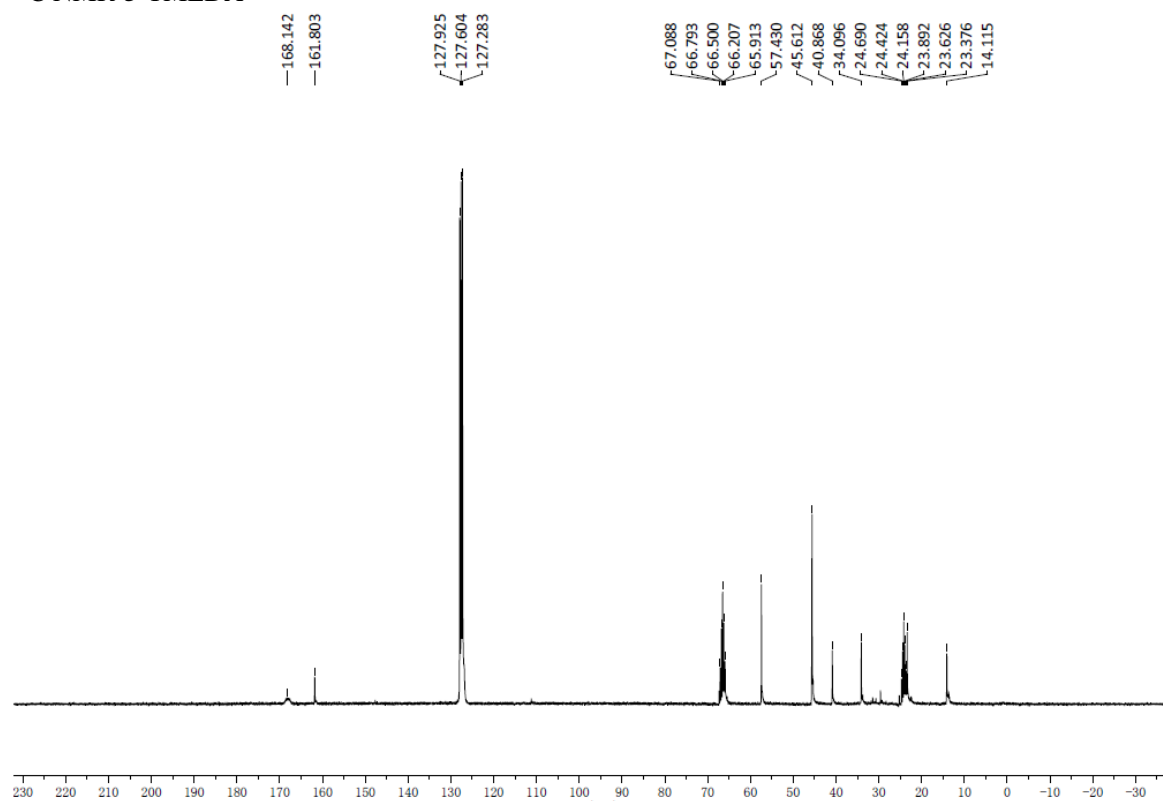

Supplement: Supplementary file 1 [file 4034047]
